# Supplementary material for: Rare non-coding variants are associated with plasma lipid traits in a founder population
Source: PubMed Central journal article supplement (PMC5704019; doi:10.1038/s41598-017-16550-8), 2017-11-27

Rare non-coding variants are associated with plasma lipid traits in a founder population

Catherine Igartua<sup>1\*</sup>, Sahar V Mozaffari<sup>1,2</sup>, Dan L Nicolae<sup>1,3,4</sup>, Carole Ober<sup>1,2</sup>

<sup>1</sup>Department of Human Genetics, University of Chicago, Chicago, IL, 60637

<sup>2</sup>Committee of Genetics, Genomics and Systems Biology, University of Chicago, Chicago, IL, 60637

<sup>3</sup>Department of Statistics, University of Chicago, Chicago, IL, 60637

<sup>4</sup>Department of Medicine, University of Chicago, Chicago, IL, 60637

\*Corresponding Author: cigartua (at) uchicago.edu

## Supplemental Data

**Supplementary Figure 1:** Quantile-quantile (QQ) plots for plasma lipid trait GWAS of rare in European variants. Dashed blue line represents the genome-wide significant threshold ( $p < 5 \times 10^{-8}$ ).

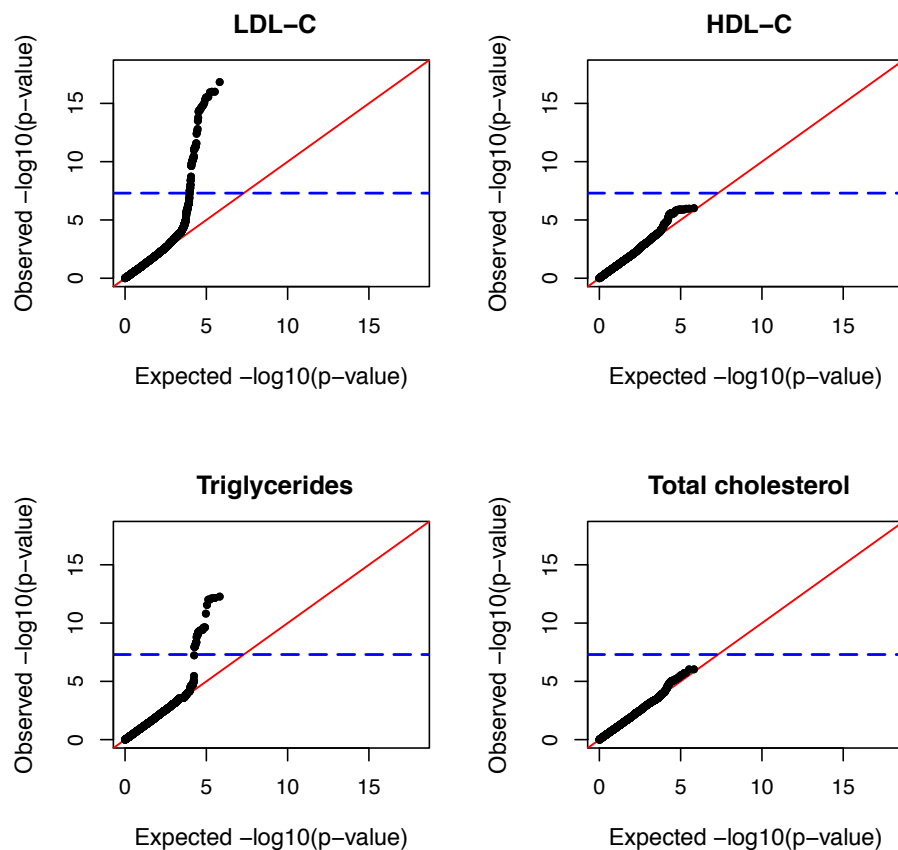

Supplementary Figure 2: Manhattan plots for plasma lipid trait GWAS of rare in European variants. Red line shows the genome-wide significant threshold ( $p < 5 \times 10^{-8}$ ). Labeled variants are the most significant variant at each genome-wide significant locus.

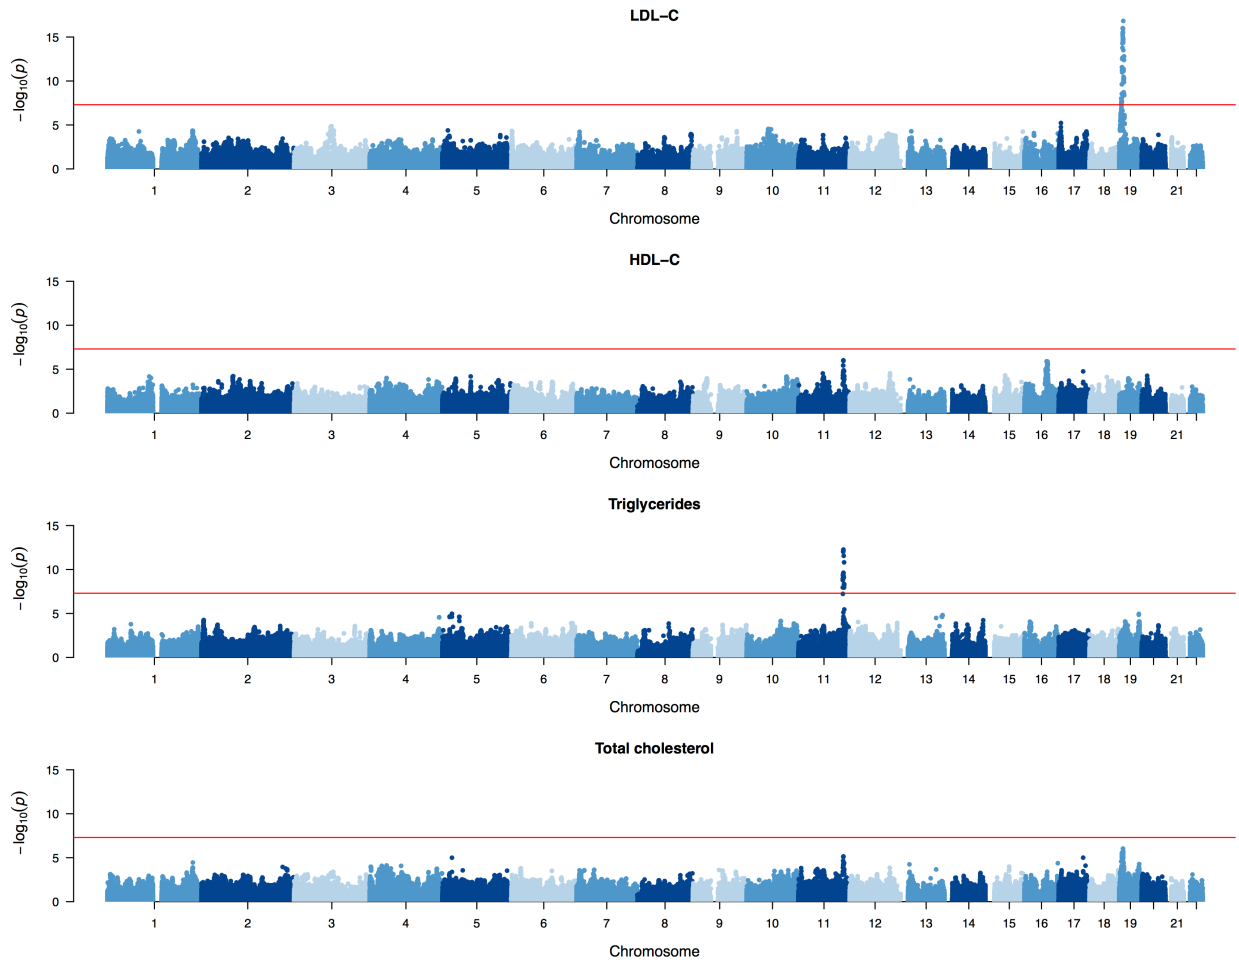

**Supplementary Table 1: Rare variants in Europeans fgwas combined model for LDL-C.** The parameters inferred from a single annotation model for LDL-C along and the marginal effect of each annotation in the final model are shown.

| Parameter                                                   | Description                                                              | $\log_2(\text{effect})$<br>[95% CI] | Penalized<br>effect | Marginal effect<br>[95% CI] |
|-------------------------------------------------------------|--------------------------------------------------------------------------|-------------------------------------|---------------------|-----------------------------|
| Gene-rich region                                            | Regional annotation: top 1/3 of gene density                             | 0.45<br>[0.13,0.74]                 | 0.47                | 0.41<br>[0.07,0.70]         |
| Gene-poor region                                            | Regional annotation: bottom 1/3 of gene density                          | -5.27<br>[-20,-1.62]                | -2.38               | -25.37<br>[-40,-1.82]       |
| Enhancer Primary Natural Killer cells from peripheral blood | Epigenome Roadmap putative enhancer region <sup>a</sup>                  | 2.48<br>[1.10,3.63]                 | 1.97                | 2.20<br>[0.70,3.26]         |
| Enhancer H1 BMP4 Derived Trophoblast Cultured Cells         | Epigenome Roadmap putative enhancer region <sup>a</sup>                  | 1.26<br>[0.14,2.19]                 | 1.08                | 1.33<br>[0.11,2.29]         |
| Enhancer Stomach Mucosa                                     | Epigenome Roadmap putative enhancer region <sup>a</sup>                  | -2.52<br>[-5.49,-0.87]              | -1.52               | -0.43<br>[-3.41,1.16]       |
| H3K4me1_Trynka                                              | H3K4me1 peaks post-processed by Trynka <i>et al.</i> (2013) <sup>b</sup> | 0.83<br>[0.11,1.67]                 | 0.85                | 1.15<br>[0.37,2.04]         |

<sup>a</sup>Putative enhancer region delineated using DNase I regions ( $-\log(\text{pvalue}) > 10$ ), annotated with the 5 mark-15 state model on observed data across 127 epigenomes (ROADMAP + ENCODE). Data downloaded from Reg2Map Honeybadger2. <sup>b</sup>Bed files downloaded from data published in Finucane *et al.* (2015)<sup>60</sup>.

**Supplementary Table 2: Rare variants in Europeans fgwas combined model for TG levels.** Presented are the parameters inferred from a single annotation model for TG levels and the marginal effect of each annotation in the final model.

| Parameter                                                      | Description                                                                                                                                                                    | $\log_2(\text{effect})$<br>[95% CI] | Penalized<br>effect | Marginal effect<br>[95% CI] |
|----------------------------------------------------------------|--------------------------------------------------------------------------------------------------------------------------------------------------------------------------------|-------------------------------------|---------------------|-----------------------------|
| Gene-rich region                                               | Regional annotation: top 1/3 of gene density                                                                                                                                   | 0.21<br>[-0.62,0.86]                | 0.11                | 0.09<br>[-0.75,0.73]        |
| Gene-poor region                                               | Regional annotation: bottom 1/3 of gene density                                                                                                                                | 0.07<br>[-0.84,0.74]                | -0.02               | -0.02<br>[-0.93,0.66]       |
| Transcr_Hoffman                                                | Transcribed regions defined as the union over the six cell lines from the combined chromHMM and Segway annotations in Hoffman <i>et al.</i> (2013) <sup>b</sup>                | -1.59<br>[-3.63,-0.01]              | -1.50               | -1.99<br>[-4,-0.42]         |
| Enhancer Breast Myoepithelial Primary Cells                    | Epigenome Roadmap putative enhancer region <sup>a</sup>                                                                                                                        | 29.66<br>[0.86,49.66]               | 1.21                | 1.48<br>[-0.28,3.02]        |
| Noncoding transcript variant                                   | A transcript variant of a noncoding RNA gene                                                                                                                                   | -0.52<br>[-2.61,1.06]               | -0.48               | -0.58<br>[-2.72,1.04]       |
| Enhancer_Hoffman extend 500                                    | Enhancer regions extended by 500bp defined as the union over the six cell lines from the combined chromHMM and Segway annotations in Hoffman <i>et al.</i> (2013) <sup>b</sup> | -28.17<br>[-48.17,0.12]             | -1.43               | -7.79<br>[-20,-0.28]        |
| FetalDHS_Trynka extend 500                                     | Fetal DNase hypersensitivity site extended by 500bp. Combination of ENCODE and Roadmap Epigenomics DHS data, post-processed by Trynka <i>et al.</i> (2013) <sup>b</sup>        | -0.82<br>[-2.16,0.29]               | -0.66               | -0.77<br>[-2.06,0.33]       |
| Enhancer Breast variant Human Mammary Epithelial Cells (vHMEC) | Epigenome Roadmap putative enhancer region <sup>a</sup>                                                                                                                        | 1.25<br>[-1.19,2.74]                | 1.10                | 1.57<br>[-0.65,3.76]        |
| DGF_ENCODE                                                     | Digital genomic footprinting (DGF) from Encode <sup>b</sup>                                                                                                                    | -0.07<br>[-1.90,1.19]               | -0.29               | -0.41<br>[-2.03,0.82]       |
| Enhancer_Andersson extend 500                                  | FANTOM5 enhancers extended by 500bp were obtained from Andersson <i>et al.</i> (2014) <sup>b</sup>                                                                             | -0.05<br>[-20,2.171]                | 0.02                | 0.12<br>[-20,2.15]          |

<sup>a</sup>Putative enhancer region delineated using DNase I regions ( $-\log(p\text{value}) > 10$ ), annotated with the 5 mark-15 state model on observed data across 127 epigenomes (ROADMAP + ENCODE). Data downloaded from Reg2Map Honeybadger2. <sup>b</sup>Bed files downloaded from data published in Finucane *et al.* (2015)<sup>60</sup>.

**Supplementary Table 3: Rare variants in Europeans fgwas combined model for HDL-C.** Presented are the parameters inferred from a single annotation model HDL-C and the marginal effect of each annotation in the final model.

| Parameter                                                               | Description                                                | $\log_2(\text{effect})$<br>[95% CI] | Penalized<br>effect | Marginal effect<br>[95% CI] |
|-------------------------------------------------------------------------|------------------------------------------------------------|-------------------------------------|---------------------|-----------------------------|
| Enhancer iPS DF<br>19.11 Cells                                          | Epigenome Roadmap putative<br>enhancer region <sup>a</sup> | 34.14<br>[2.27,54.14]               | 2.69                | 4.42<br>[0.75,20]           |
| Enhancer Fetal<br>Intestine Small                                       | Epigenome Roadmap putative<br>enhancer region <sup>a</sup> | -159.72<br>[-179.72,-2.23]          | -1.37               | -28.77<br>[-48.77,1.86]     |
| Promoter Breast<br>variant Human<br>Mammary Epithelial<br>Cells (vHMEC) | Epigenome Roadmap putative<br>enhancer region <sup>a</sup> | 68.72<br>[-0.57,88.71]              | 0.60                | 33.60<br>[1.93,53.6]        |

<sup>a</sup>Putative enhancer region delineated using DNase I regions ( $-\log(\text{pvalue}) > 10$ ), annotated with the 5 mark-15 state model on observed data across 127 epigenomes (ROADMAP + ENCODE).

**Supplementary Table 4: Rare variants in Europeans fgwas combined model for total cholesterol.** Presented are the parameters inferred from a single annotation model for total cholesterol and the marginal effect of each annotation in the final model.

| Parameter                      | Description                                                                                                                                                                         | $\log_2(\text{effect})$<br>[95% CI] | Penalized<br>effect | Marginal effect<br>[95% CI] |
|--------------------------------|-------------------------------------------------------------------------------------------------------------------------------------------------------------------------------------|-------------------------------------|---------------------|-----------------------------|
| Enhancer iPS DF<br>19.11 Cells | Epigenome Roadmap putative<br>enhancer region <sup>a</sup>                                                                                                                          | 36.91<br>[1.66,56.91]               | 2.84                | 33.79<br>[3.19,53.79]       |
| Enhancer_Hoffman<br>extend 500 | Enhancer regions extended by 500bp<br>defined as the union over the six cell<br>lines from the combined chromHMM<br>and Segway annotations in Hoffman<br>et al. (2013) <sup>b</sup> | 5.83<br>[-20,20]                    | -1.11               | -85.52<br>[-105.52,-1.12]   |

<sup>a</sup>Putative enhancer region delineated using DNase I regions ( $-\log(\text{pvalue}) > 10$ ), annotated with the 5 mark-15 state model on observed data across 127 epigenomes (ROADMAP + ENCODE). Data downloaded from Reg2Map Honeybadger2. <sup>b</sup>Bed files downloaded from data published in Finucane *et al.* (2015)<sup>60</sup>.

**Supplementary Figure 3: Rare variants on chromosomes 1 and 3 are suggestively associated with increased LDL-C. (a, c). Locus plots.** The top panel shows the p-values of association with LDL-C for all variants discovered in the Hutterites regardless of allele frequency in Europeans. Symbols correspond to the maximum allele frequency in Europeans, with closed circles representing REVs (see legend), and are colored based on their LD  $r^2$  with the most associated variant in the region (rs191020975 and chr1:224811120, respectively). The next three panels show tracks for the annotations selected in the fgwas joint model, annotations of known GWAS loci from NHGRI and genes in the region. **(b, d). Genotype boxplots for LDL-C for candidate intronic variants CNH3 (chr1:224811120;  $p=7.99 \times 10^{-5}$ ) and in EPHA6 (rs191020975;  $p=1.88 \times 10^{-5}$ ).**

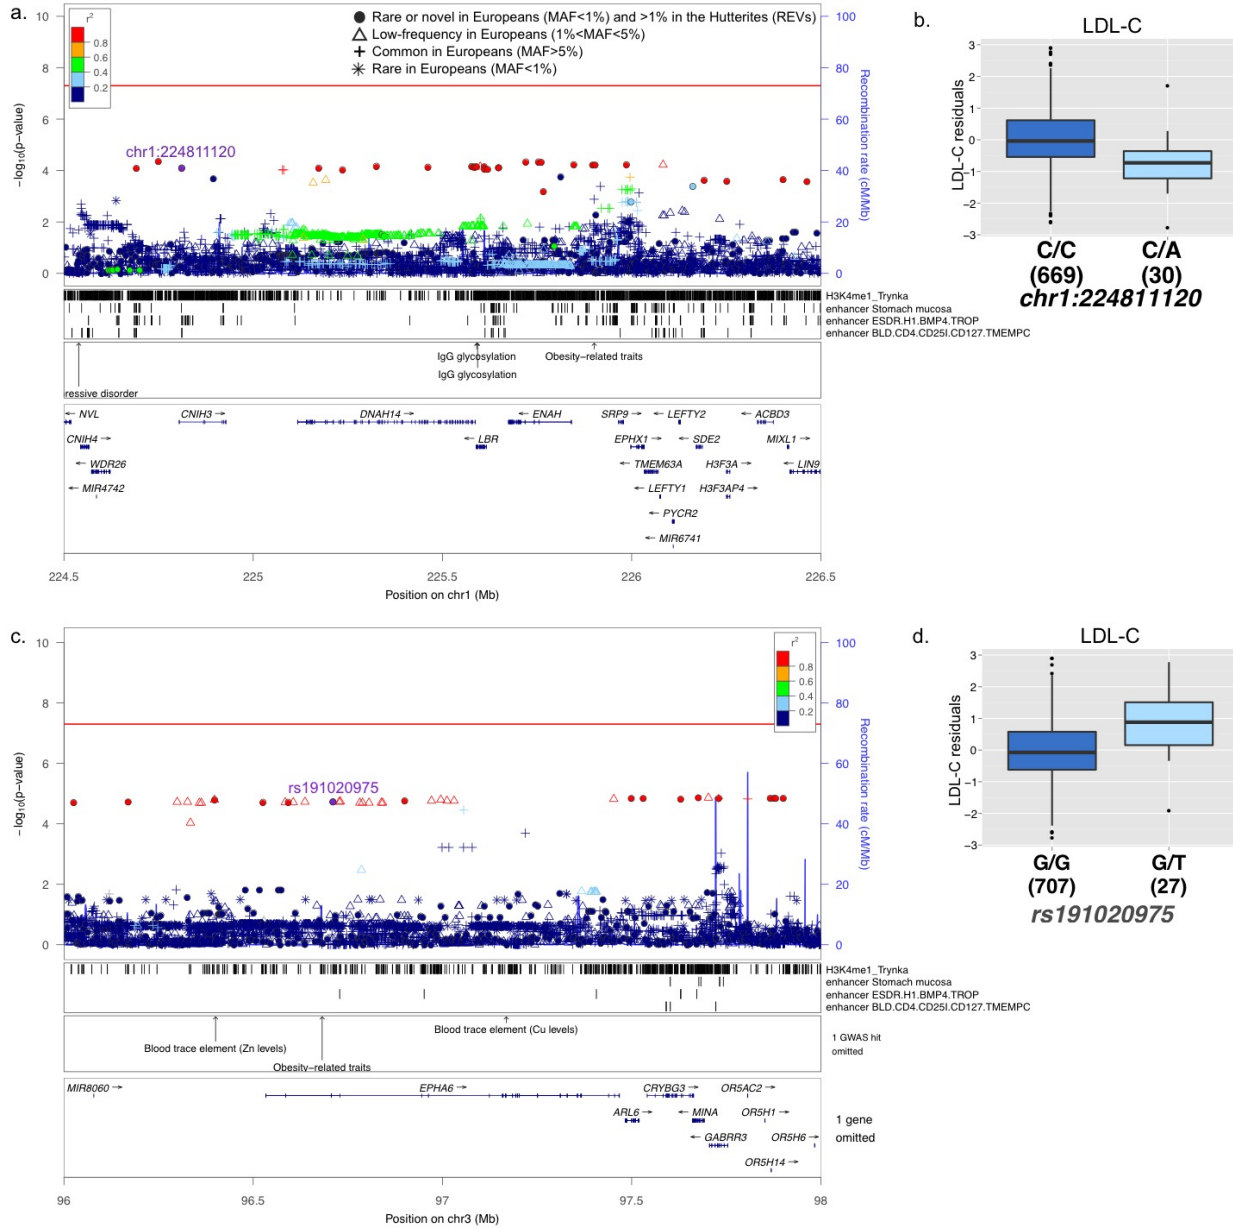

**Supplementary Figure 4: Rare variants on chromosome 11 are associated with HDL-C. (a) Locus plots.** The top panel shows the p-values of association with HDL-C for all variants discovered in the Hutterites regardless of allele frequency in Europeans. Symbols correspond to the maximum allele frequency in Europeans, with closed circles representing REVs (see legend), and are colored based on their LD  $r^2$  with the most associated variant in the region (rs184333869). The next three panels show tracks for the annotations selected in the fgwas joint model, annotations of known GWAS loci from NHGRI and genes in the region. **(b) Genotype boxplots for rs184333869 QTL associated with HDL-C levels (TMPRSS4-AS1;  $p=1.10 \times 10^{-6}$ ).**

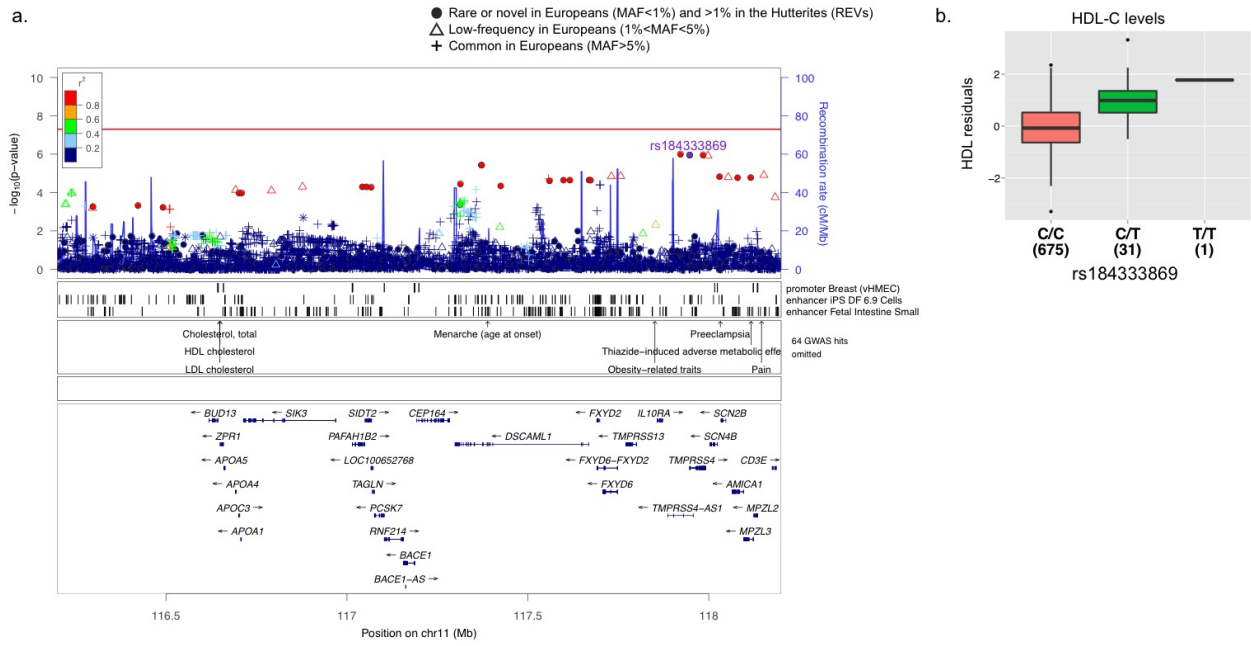



**Supplementary Figure 5: *APOC3* and *ZPR1* QTL haplotype boxplots for triglyceride levels.** Alleles were phased for the lead common signal identified in conditional analysis (rs11604424; top) and the candidate *APOC3* rare splicing variant (rs13826449; bottom). The trends observed between each of five haplotype combinations present in our sample show these variants exert opposite effects on TG levels.

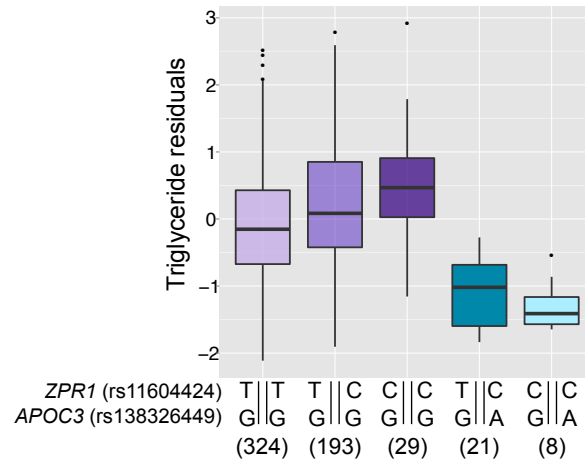

Supplement: 41598_2017_16550_MOESM1_ESM.pdf [file 41598_2017_16550_MOESM1_ESM.pdf]
